# Supplementary material for: Impact of Carbon Fixation, Distribution and Storage on the Production of Farnesene and Limonene in Synechocystis PCC 6803 and Synechococcus PCC 7002
Source: MDPI journal article supplement (doi:10.3390/ijms25073827), 2024-03-29
Supplement: s1 [file s1]

**Table S2 – Characteristics of the bacterial strains and plasmids used in this study**

| Strain/Plasmid                                                                                                                           | Relevant features                                                                                                                                                                                                                                                                                                              | Reference                          |
|------------------------------------------------------------------------------------------------------------------------------------------|--------------------------------------------------------------------------------------------------------------------------------------------------------------------------------------------------------------------------------------------------------------------------------------------------------------------------------|------------------------------------|
| <b><i>Escherichia coli</i></b>                                                                                                           |                                                                                                                                                                                                                                                                                                                                |                                    |
| <b>CM404</b>                                                                                                                             | <i>E. coli</i> strain harboring the self-transmissible plasmid pRK2013 enabling the conjugative transfer of RSF1010-derived pC plasmids into cyanobacteria                                                                                                                                                                     | (Mermet-Bouvier and Chauvat, 1994) |
| <b>TOP10</b>                                                                                                                             | <i>E. coli</i> strain for cloning                                                                                                                                                                                                                                                                                              | Invitrogen                         |
| <b>NEB 5-alpha</b>                                                                                                                       | <i>E. coli</i> strain for cloning                                                                                                                                                                                                                                                                                              | New England Biolabs                |
| <b>NEB 10-beta</b>                                                                                                                       | <i>E. coli</i> strain for cloning                                                                                                                                                                                                                                                                                              | New England Biolabs                |
| <b>Cloning vectors</b>                                                                                                                   |                                                                                                                                                                                                                                                                                                                                |                                    |
| <b>pTwist</b>                                                                                                                            | Amp <sup>R</sup> plasmid vector                                                                                                                                                                                                                                                                                                | Twist Biosciences                  |
| <b>pUC4K</b>                                                                                                                             | Source of the Km <sup>R</sup> marker with no transcription terminator                                                                                                                                                                                                                                                          | Pharmacia                          |
| <b>pC</b>                                                                                                                                | RSF1010-derived plasmid vector (Sp <sup>R</sup> /Sm <sup>R</sup> , Cm <sup>R</sup> ) harboring the strong p <sub>R</sub> promoter for constitutive gene expression in <i>E. coli</i> and cyanobacteria                                                                                                                         | (Veaudor et al., 2018)             |
| <b>Replicative plasmids for strong constitutive expression of terpene synthase genes in cyanobacteria</b>                                |                                                                                                                                                                                                                                                                                                                                |                                    |
| <b>pCLS</b>                                                                                                                              | pC derived plasmid (Sp <sup>R</sup> /Sm <sup>R</sup> , Cm <sup>S</sup> ) harboring the <i>Mentha spicata</i> 4S-limonene synthase gene (LS) cloned between the <i>NdeI</i> and <i>EcoRI</i> restriction sites                                                                                                                  | (Chenebault et al., 2020)          |
| <b>pCFS</b>                                                                                                                              | pC derivative (Sp <sup>R</sup> /Sm <sup>R</sup> , Cm <sup>S</sup> ) carrying the <i>Picea abies</i> farnesene synthase gene (FS) cloned between <i>NdeI</i> and <i>EcoRI</i>                                                                                                                                                   | (Blanc-Garin et al., 2022)         |
| <b>Replicative plasmids for strong constitutive expression of terpene synthase encoding genes and <i>crtE</i> genes in cyanobacteria</b> |                                                                                                                                                                                                                                                                                                                                |                                    |
| <b>pCLS-CrtE<sub>6803</sub></b>                                                                                                          | pCLS derived plasmid (Sm <sup>R</sup> /Sp <sup>R</sup> ) harboring the <i>crtE</i> gene from S.6803 cloned downstream the LS gene between the <i>EcoRI</i> and <i>AclI</i> sites                                                                                                                                               | This study                         |
| <b>pCLS-CrtE<sub>7002</sub></b>                                                                                                          | pCLS derived plasmid (Sm <sup>R</sup> /Sp <sup>R</sup> ) harboring the <i>crtE</i> gene from S.7002 cloned downstream the LS gene, between the <i>EcoRI</i> and <i>AclI</i> sites                                                                                                                                              | This study                         |
| <b>pCFS-CrtE<sub>6803</sub></b>                                                                                                          | pCFS derived plasmid (Sm <sup>R</sup> /Sp <sup>R</sup> ) harboring the <i>crtE</i> gene from S.6803 cloned downstream the FS gene, between the <i>EcoRI</i> and <i>AclI</i> sites                                                                                                                                              | This study                         |
| <b>pCFS-CrtE<sub>7002</sub></b>                                                                                                          | pCFS derived plasmid (Sm <sup>R</sup> /Sp <sup>R</sup> ) harboring the <i>crtE</i> gene from S.7002 cloned downstream the FS gene, between the <i>EcoRI</i> and <i>AclI</i> sites                                                                                                                                              | This study                         |
| <b>Plasmids used for deletion of <i>cruF crtR</i>, <i>phaAB</i>, <i>ccmK</i> or <i>crtE</i> in <i>Synechocystis</i> PCC 6803</b>         |                                                                                                                                                                                                                                                                                                                                |                                    |
| <b>pTwist_CrtR</b>                                                                                                                       | pTwist harboring an <i>EcoRV</i> restriction site flanked by two platforms of homology for deletion of the <i>crtR</i> open reading frame from the ATG start codon to the 245 amino acids of <i>CrtR</i> from <i>Synechocystis</i> PCC 6803. The 67 last amino acids are conserved to avoid the truncation of <i>slr1543</i> . | This study & Twist Biosciences     |
| <b>pCrtR_Km</b>                                                                                                                          | pTwist_CrtR harboring a Km <sup>R</sup> cassette cloned in the <i>EcoRV</i> site                                                                                                                                                                                                                                               | This study                         |
| <b>pTwist_CruF</b>                                                                                                                       | pTwist harboring an <i>EcoRV</i> restriction site flanked by two platforms of homology for deletion of the <i>cruF</i> open reading frame from the amino acid 100 to the amino acid 271 from <i>Synechocystis</i> PCC 6803 to avoid truncation of genes <i>sll0813</i> and <i>sll0815</i>                                      | This study and Twist Biosciences   |
| <b>pCruF_Km</b>                                                                                                                          | pTwist_CruF harboring a Km <sup>R</sup> cassette cloned in the <i>EcoRV</i> site                                                                                                                                                                                                                                               | This study                         |
| <b>pTwist_phaAB</b>                                                                                                                      | pTwist harboring an <i>EcoRV</i> restriction site flanked by two platforms of homology for deletion or <i>phaA</i> and <i>phaB</i> genes                                                                                                                                                                                       | This study and Twist Biosciences   |

|                                                                                                                                    |                                                                                                                                                                                                                                                                             |                                 |
|------------------------------------------------------------------------------------------------------------------------------------|-----------------------------------------------------------------------------------------------------------------------------------------------------------------------------------------------------------------------------------------------------------------------------|---------------------------------|
| <b>pphaAB_Km</b>                                                                                                                   | pTwist_phaAB harboring a Km <sup>R</sup> cassette cloned in the <i>EcoRV</i> site                                                                                                                                                                                           | This study                      |
| <b>pTwist_CcmK3K4_Km</b>                                                                                                           | pTwist_CcmK3K4 harboring a Km <sup>R</sup> cassette cloned in the <i>SwaI</i> et <i>BamHI</i> site                                                                                                                                                                          | This study and Twist Bioscience |
| <b>Replicative plasmids for strong constitutive expression of <i>rbc</i> operon or <i>prk</i> genes from various cyanobacteria</b> |                                                                                                                                                                                                                                                                             |                                 |
| <b>pC-rbcLXS_Scy6803</b>                                                                                                           | pC derivative plasmid (Sp <sup>R</sup> /Sm <sup>R</sup> ) harboring the ribulose-1,5-bisphosphate carboxylase/oxygenase (RuBisCO) encoding operon ( <i>rbcLXS</i> ) from <i>Synechocystis</i> PCC 6803 cloned in between the <i>NdeI</i> and <i>EcoRI</i> restriction sites | This study                      |
| <b>pC-rbcLS_Sco7942</b>                                                                                                            | pC derivative plasmid (Sp <sup>R</sup> /Sm <sup>R</sup> ) harboring the ribulose-1,5-bisphosphate carboxylase/oxygenase (RuBisCO) encoding operon ( <i>rbcLS</i> ) from <i>Synechococcus</i> PCC 7942 cloned in between the <i>NdeI</i> and <i>EcoRI</i> restriction sites  | This study                      |
| <b>pC-rbcLXS_Sco7002</b>                                                                                                           | pC derivative plasmid (Sp <sup>R</sup> /Sm <sup>R</sup> ) harboring the ribulose-1,5-bisphosphate carboxylase/oxygenase (RuBisCO) encoding operon ( <i>rbcLXS</i> ) from <i>Synechococcus</i> PCC 7002 cloned in between the <i>NdeI</i> and <i>EcoRI</i> restriction site  | This study                      |
| <b>pC- rbcLXS_Cya7425</b>                                                                                                          | pC derivative plasmid (Sp <sup>R</sup> /Sm <sup>R</sup> ) harboring the ribulose-1,5-bisphosphate carboxylase/oxygenase (RuBisCO) encoding operon ( <i>rbcLXS</i> ) from <i>Cyanothece</i> PCC 7425 cloned in between the <i>NdeI</i> and <i>EcoRI</i> restriction site     | This study                      |
| <b>pC-prk_Cya7425</b>                                                                                                              | pC derivative plasmid (Sp <sup>R</sup> /Sm <sup>R</sup> ) harboring the phosphoribulokinase encoding gene ( <i>prk</i> ) from <i>Cyanothece</i> PCC 7425 cloned in between the <i>NdeI</i> and <i>EcoRI</i> restriction sites                                               | This study                      |

References:

- Mermet-Bouvier, P.; Chauvat, F.. *Curr. Microbiol.* **1994**, *28*, 145–148, doi:10.1007/BF01571055.
- Chenebault, C. *et al. Front. Microbiol.* **2020**, *11*, 586–601, doi:10.3389/fmicb.2020.586601.
- Blanc-Garin, V.; Chenebault, C. *et al. .. Biotechnol. Biofuels* **2022**, *15*, doi:10.1186/s13068-022-02211-0.
