# Supplementary material for: Impact of Carbon Fixation, Distribution and Storage on the Production of Farnesene and Limonene in Synechocystis PCC 6803 and Synechococcus PCC 7002
Source: MDPI journal article supplement (doi:10.3390/ijms25073827), 2024-03-29
Supplement: s1 [file s1]

**Table S1 – Characteristics of the oligonucleotides primers used in this study**

| Name                                                                                       | Sequence (5'-3')                         | Purpose                                                                                                                                                                      |
|--------------------------------------------------------------------------------------------|------------------------------------------|------------------------------------------------------------------------------------------------------------------------------------------------------------------------------|
| pC and pC derivatives                                                                      |                                          |                                                                                                                                                                              |
| pC_Fw                                                                                      | TCATAAATTGCTTTAAGGCG                     | Forward (Fw) and reverse (Rv) primers for PCR amplification and DNA sequencing of the coding sequences cloned in pC                                                          |
| pC_Rv                                                                                      | GTGTAACAAGGGTGAACAC                      |                                                                                                                                                                              |
| pFC1_Fw                                                                                    | GGCGACGTGCGTCCTCAAGC                     | Forward (Fw) and reverse (Rv) primers for PCR amplification and DNA sequencing of the coding sequences cloned in pC                                                          |
| pFC1_Rv                                                                                    | GTGTAACAAGGGTGAACAC                      |                                                                                                                                                                              |
| pFC1_seq_rev_Theo                                                                          | CGTTTCAGTTTGCTCATGGA                     | Forward (Fw) primer for PCR amplification and sequencing of inserts ( <i>prk gene</i> or <i>rbc operons</i> ) cloned in the pC vector.                                       |
| Km_HincII_Fw                                                                               | GGCGCTGAGGTCGACCTCGTGAAGAAG              | Forward (Fw) and reverse (Rv) primers used for Km <sup>r</sup> cassette amplification and <i>HincII</i> restriction sites addition.                                          |
| Km_HincII_Rv                                                                               | ACCTGCAGGGGGTCGACGGAAGCCAC               |                                                                                                                                                                              |
| Mv13_Fw                                                                                    | GTAAAACGACGGCCAGT                        | Forward (Fw) and reverse (Rv) primers using for sequencing plasmids send by Twist Biosciences and verify the insertion of the Km <sup>r</sup> cassette in the good direction |
| Mv13_Rv                                                                                    | CAGGAAACAGCTATGAC                        |                                                                                                                                                                              |
| Km1_Rv                                                                                     | ACGTTTCCCGTTGAATATGGCTC                  |                                                                                                                                                                              |
| Amplification and cloning of <i>rbc</i> operon from various cyanobacteria in the pC vector |                                          |                                                                                                                                                                              |
| rbcLXS_S6803_For(long)                                                                     | GTACTACATATGGTACAAGCCAAAGCAGGGTTTAAGGC   | Forward (Fw) and reverse (Rv) primers for PCR amplification of <i>rbcLXS</i> operon from S6803 and cloning as a <i>NdeI-EcoRI</i> DNA fragment in the pC vector              |
| rbcLXS_S6803_Rev(long)                                                                     | TACGTAGAATTCTTAGTAACGGCCTTGTTTGGTTGGGT   |                                                                                                                                                                              |
| rbcLXS_S7002_For(long)                                                                     | GTACTACATATGGTTCAGACCAAATCTGCTGGGTTTAAT  | Forward (Fw) and reverse (Rv) primers for PCR amplification of <i>rbcLXS</i> operon from S7002 and cloning as a <i>NdeI-PvuII</i> DNA fragment in the pCvector               |
| rbcLXS_S7002_Rev(long)                                                                     | TACGTACAGCTGTTAGTAACGGGTTTGTTGGGCTTGTAAC |                                                                                                                                                                              |
| rbcLS_S7942_For                                                                            | GTACTACATATGCCCAAGACGCAATCT              | Forward (Fw) and reverse (Rv) primers for PCR amplification of of <i>rbcLS</i> operon from S7942 and cloning as a <i>NdeI-PvuII</i> DNA fragment in the pCvector             |
| rbcLS_S7942_Rev                                                                            | TACGTACAGCTGTTAGTAGCGGCCGGGACG           |                                                                                                                                                                              |
| rbcC7425_For                                                                               | GTACTACTCGAGATGTCCTACGCTCAAACA           | Forward (Fw) and reverse (Rv) primers for PCR amplification of of <i>rbcLS</i> operon from C7425 and cloning as a <i>XhoI-PvuII</i> DNA fragment in the pCvector             |
| rbcC7425_Rev                                                                               | TACGTATCCGGATTAGTAGCGATAGCCAC            |                                                                                                                                                                              |
| pFC1_RbcS6803(rv_intra)                                                                    | TAATTGGTAAATTGCTGTGCG                    | Reverse (Rv) primer for sequencing of the <i>rbcLXS</i> operon from S6803 cloned in the pC vector                                                                            |

|                                                                          |                                                        |                                                                                                                                                                                                                              |
|--------------------------------------------------------------------------|--------------------------------------------------------|------------------------------------------------------------------------------------------------------------------------------------------------------------------------------------------------------------------------------|
| pFC1_RbcS7002(rv_intra                                                   | AGCTGCTGACTAATTAGACG                                   | Reverse (Rv) primer for sequencing of the <i>rbcLXS</i> operon from S7002 cloned in the pC vector                                                                                                                            |
| pFC1_RbcS7942(rv_intra                                                   | ATGTGCCACACGTGGATAC                                    | Reverse (Rv) primer for sequencing of the <i>rbcLS</i> operon from S7942 cloned in the pC vector                                                                                                                             |
| pFC1_RbcC7425(rv_intra)                                                  | TGGTTGTATCTTTGGATATT                                   | Reverse (Rv) primer for sequencing of the <i>rbcLS</i> operon from C7425 cloned in the pC vector                                                                                                                             |
| Amplification and cloning in the pC of phosphoribulokinase encoding gene |                                                        |                                                                                                                                                                                                                              |
| PRK_C7425_Fwd                                                            | GTACTACATATGACCTCTAAGCCAGACCGT                         | Forward (Fw) and reverse (Rv) primers for PCR amplification of <i>prk</i> gene from C7425 and cloning as a <i>NdeI-EcoRI</i> DNA fragment in the pC vector                                                                   |
| PRK_C7425_Rev                                                            | TACGTAGAATTCTCTACACCACAGCGGGTTC                        |                                                                                                                                                                                                                              |
| Construction of the pCFS-CrtE plasmids                                   |                                                        |                                                                                                                                                                                                                              |
| CrtE6803_XhoI_Fwd                                                        | AATGGTCACTCGAG <u>AGGAGA</u> ACAGCTATGGTTGCCCAACAAACAG | Forward primer for amplification of <i>crtE</i> from S.6803 and cloning downstream the stop codon of the FS gene in the pCFS (Table S1). Addition of a <i>XhoI</i> site (bold) and a RBS (underlined) before the start codon |
| CrtE6803_EcoRI_Rev                                                       | TTATCTCCGGAATTC <u>TCA</u> ATATTTTCTGGCAACAATATATTCGG  | Reverse primer for amplification of <i>crtE</i> from S.6803 and cloning downstream the FS gene in the pCFS (Table S1). Addition of an <i>EcoRI</i> site (bold) after the stop codon (underlined)                             |
| CrtE6803_int_Rev                                                         | TCAAACGCATAGGCTAGCAG                                   | Reverse primer to verify the <i>FScrtE</i> operon                                                                                                                                                                            |
| CrtE7002_XhoI_Fwd                                                        | TTTCCAAACTCGAG <u>AGGAGA</u> ACAGCTATGGTAGTTGCAGACG    | Forward primer for amplification of <i>crtE</i> from S.7002 and cloning downstream the stop codon of the FS gene in the pCFS (Table S1). Addition of a <i>XhoI</i> site (bold) and a RBS (underlined) before the start codon |
| CrtE7002_EcoRI_Rev                                                       | TTGGCACTGAATTC <u>TTA</u> GTTTTTACGGTTAACGATGTATTCC    | Reverse primer for amplification of <i>crtE</i> from S.7002 and cloning downstream the FS gene in the pCFS (Table S1). Addition of an <i>EcoRI</i> site (bold) after the stop codon (underlined)                             |
| CrtE7002_int_Rev                                                         | TTCTACGGCAACATCGGTTT                                   | Reverse primer to verify the <i>FscrtE</i> operon                                                                                                                                                                            |
| FS_Fwd2                                                                  | TTGCTCCGCGCGAGTTACAT                                   | Forward primers to verify the <i>FscrtE</i> operon                                                                                                                                                                           |
| FS_Fwd3                                                                  | CCAAGGCCGTGATATGTTGA                                   |                                                                                                                                                                                                                              |
| FS_Fwd4                                                                  | AGTAATGCGTACCGTACTGG                                   |                                                                                                                                                                                                                              |
| Construction of pCLS-CrtE plasmids                                       |                                                        |                                                                                                                                                                                                                              |
| CrtE6803_EcoRI_Fwd                                                       | AATGGTGAATTCAG <u>AGGAGA</u> ACAGCTATGGTTGCCCAACAAAC   | Forward primer for amplification of <i>crtE</i> from S.6803 and cloning downstream the stop codon of the LS gene in the pCLS (Table S1).                                                                                     |

|                                                                |                                                           |                                                                                                                                                                                                                                |
|----------------------------------------------------------------|-----------------------------------------------------------|--------------------------------------------------------------------------------------------------------------------------------------------------------------------------------------------------------------------------------|
|                                                                |                                                           | Addition of a <i>Eco</i> RI site (bold) and a RBS (underlined) before the start codon                                                                                                                                          |
| CrtE6803_AclI_Rev                                              | GTCCATCGTTACGGAACGTT <u>CA</u> ATATTTTCTGGCAACAA          | Reverse primer for amplification of <i>crtE</i> from S.6803 and cloning downstream the FS gene in the pCLS (Table S1). Addition of an <i>Ac</i> I site (bold) after the stop codon (underlined)                                |
| CrtE7002_EcoRI_Fwd                                             | AATGGTGAATTCAG <u>AGG</u> AGAACAGCTATGGTAGTTGCAGACGCTCA   | Forward primer for amplification of <i>crtE</i> from S.6803 and cloning downstream the stop codon of the LS gene in the pCLS (Table S1). Addition of a <i>Eco</i> RI site (bold) and a RBS (underlined) before the start codon |
| CrtE7002_AclI_Rev                                              | GTCCCTCGTTACGGAACGTTT <u>TA</u> GTTTTTACGGTTAACGATGTATTCC | Reverse primer for amplification of <i>crtE</i> from S.7002 and cloning downstream the FS gene in the pCLS (Table S1). Addition of an <i>Ac</i> I site (bold) after the stop codon (underlined)                                |
| LS_Fwd3                                                        | TGTCCGATTATAATGCCTCCG                                     | Forward (Fw) and reverse (Rev) primers for amplification of the LS part of <i>LscrtE</i> operon                                                                                                                                |
| Pr_LS_Rev                                                      | cctgcaggtcTTAAGCAAAGGGCTCAAAC                             |                                                                                                                                                                                                                                |
| Deletion of <i>phaAB</i> in <i>Synechocystis</i> PCC 6803      |                                                           |                                                                                                                                                                                                                                |
| phaAB_Fw                                                       | GCATCCCATTGGAGCGTCG                                       | Forward (Fw) and reverse (Rv) primers used to monitor the segregation of $\Delta$ <i>phaAB::Km<sup>R</sup></i> chromosome in <i>Synechocystis</i> PCC 6803                                                                     |
| phaAB_Rv                                                       | CCCAGGGCTTCAGTATTACC                                      |                                                                                                                                                                                                                                |
| Deletion of CrtR in <i>Synechocystis</i> PCC 6803              |                                                           |                                                                                                                                                                                                                                |
| crtR_Fw                                                        | CGTCAATACACCATCTGGCT                                      | Forward (Fw) and reverse (Rv) primers used to monitor the segregation of $\Delta$ <i>crt::Km<sup>R</sup></i> chromosome in <i>Synechocystis</i> PCC 6803                                                                       |
| crtR_Rw                                                        | GTGTTGATCTCCTTGATTGG                                      |                                                                                                                                                                                                                                |
| Deletion of <i>cruF</i> in <i>Synechocystis</i> PCC 6803       |                                                           |                                                                                                                                                                                                                                |
| cruF_Fw                                                        | ATAGCGAGCTTGTCGTGCCA                                      | Forward (Fw) and reverse (Rv) primers used to monitor the segregation of $\Delta$ <i>cruF::Km<sup>R</sup></i> chromosome in <i>Synechocystis</i> PCC 6803                                                                      |
| cruF_Rv                                                        | CCACCTGGGACTCGCCAATA                                      |                                                                                                                                                                                                                                |
| Deletion of <i>ccmK</i> genes in <i>Synechocystis</i> PCC 6803 |                                                           |                                                                                                                                                                                                                                |
| CcmK3 FW                                                       | GGCTGGCCACCATAGCG                                         | Forward (Fw) and reverse (Rv) primers used to monitor the segregation of $\Delta$ <i>ccmK3K4::Km<sup>R</sup></i> chromosome in <i>Synechocystis</i> PCC 6803                                                                   |
| CcmK4 rev                                                      | GTAACCCACCTTATCTCG                                        |                                                                                                                                                                                                                                |

References:

- Mermet-Bouvier, P.; Chauvat, F.. *Curr. Microbiol.* **1994**, 28, 145–148, doi:10.1007/BF01571055.
- Chenebault, C. *et al. Front. Microbiol.* **2020**, 11, 586–601, doi:10.3389/fmicb.2020.586601.
- Blanc-Garin, V.; Chenebault, C. *et al. .. Biotechnol. Biofuels* **2022**, 15, doi:10.1186/s13068-022-02211-0.
